# Supplementary material for: Risk Assessment of Spodoptera exempta against Food Security: Estimating the Potential Global Overlapping Areas of Wheat, Maize, and Rice under Climate Change
Source: MDPI journal article supplement (doi:10.3390/insects15050348), 2024-05-13
Supplement: s1 [file s1]

## Supplementary material

**Table S1.** Meanings of 19 bioclimatic variables in worldclim

| Variable | Description                                          | Unit |
|----------|------------------------------------------------------|------|
| Bio1     | Annual mean temperature                              | °C   |
| Bio2     | Mean diurnal air temperature range                   | °C   |
| Bio3     | Isothermality (bio2/bio7) (*100)                     | -    |
| Bio4     | Standard deviation temperature seasonality           | -    |
| Bio5     | Max temperature of warmest month                     | °C   |
| Bio6     | Min temperature of coldest month                     | °C   |
| Bio7     | Temperature annual area (bio5-bio6)                  | °C   |
| Bio8     | Mean temperature of wettest quarter                  | °C   |
| Bio9     | Mean temperature of driest quarter                   | °C   |
| Bio10    | Mean temperature of warmest quarter                  | °C   |
| Bio11    | Mean temperature of coldest quarter                  | °C   |
| Bio12    | Annual precipitation                                 | mm   |
| Bio13    | Precipitation of wettest month                       | mm   |
| Bio14    | Precipitation of driest month                        | mm   |
| Bio15    | Precipitation seasonality (coefficient of variation) | -    |
| Bio16    | Precipitation of wettest quarter                     | mm   |
| Bio17    | Precipitation of driest quarter                      | mm   |
| Bio18    | Precipitation of warmest quarter                     | mm   |
| Bio19    | Precipitation of coldest quarter                     | mm   |

**Table S2.** Meanings of the selected two emission scenarios.

| Emission | Description                                                                                                                                                         |
|----------|---------------------------------------------------------------------------------------------------------------------------------------------------------------------|
| SSP1-2.6 | SSP1 (Low forcing scenario) Upgrade to RCP2.6 scenario based on (Radiative forcing reaches 2.6 W/m <sup>2</sup> in 2100)                                            |
| SSP5-8.5 | SSP5 (High Forcing Scenario) Upgrade to RCP8.5 scenario based on (SSP5 is the only SSP scenario that can achieve radiative forcing to 8.5 W/m <sup>2</sup> in 2100) |

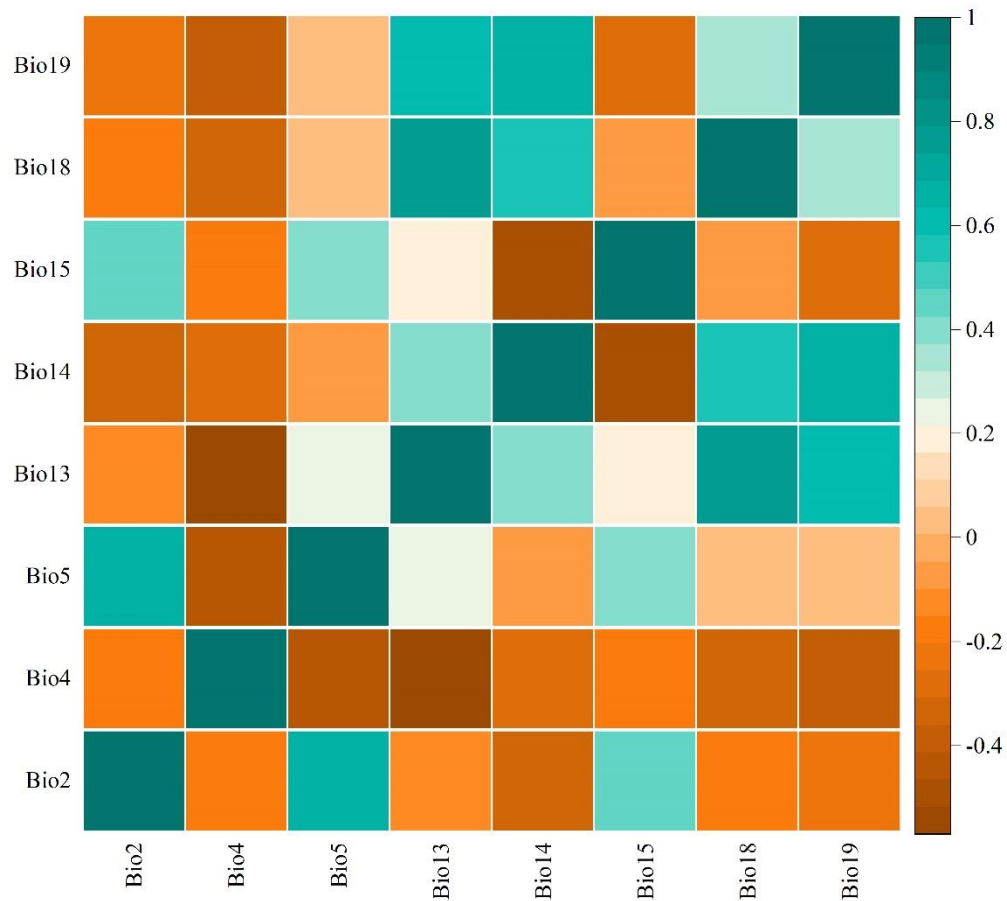

**Figure S1.** Eight bioclimatic variables used to construct the MaxEnt model: absolute correlations were less than 0.8 ( $|r| < 0.8$ ).

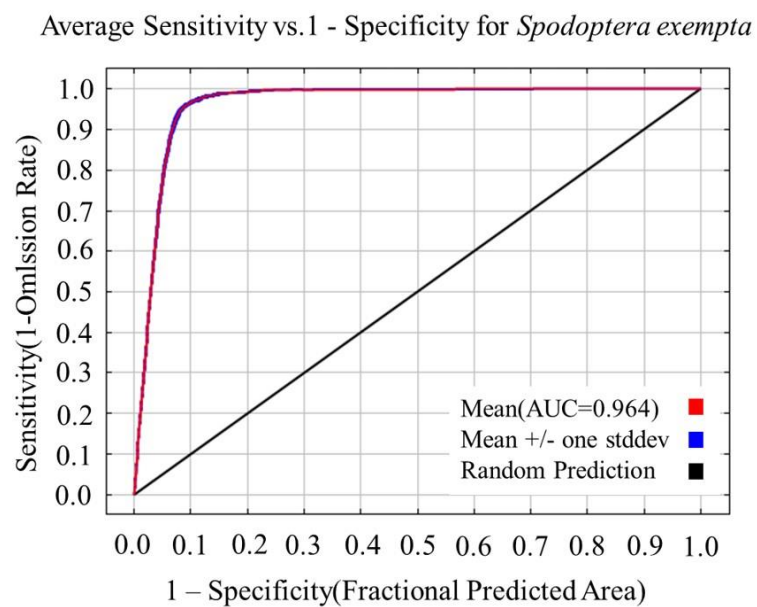

**Figure S2.** ROC curve and the value of Mean (AUC) for the MaxEnt model after optimal parameter combinations.

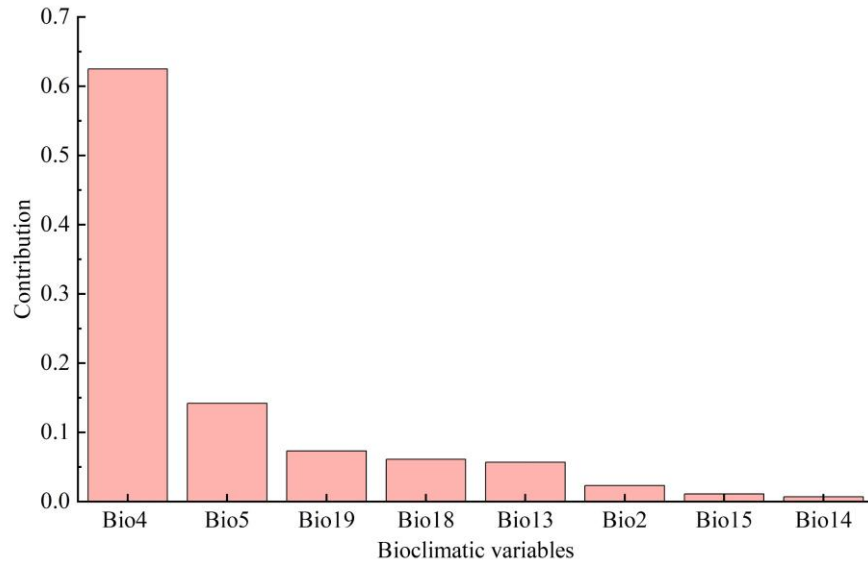

**Figure S3.** Contribution of each bioclimatic variables related to the distribution of *Spodoptera exempta*.

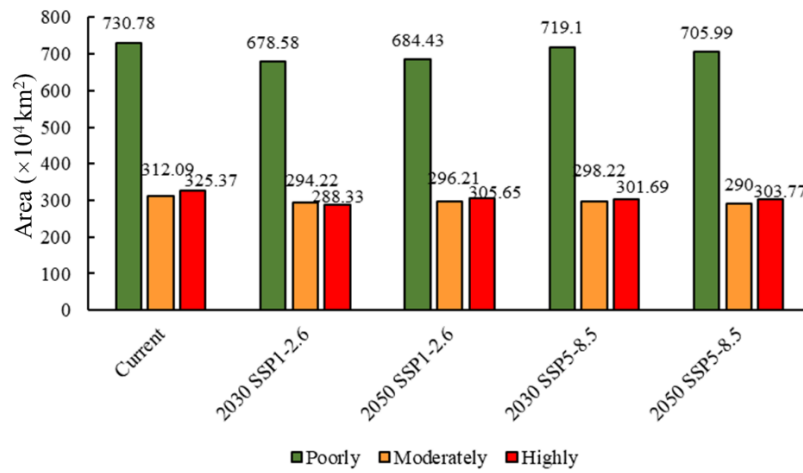

**Figure S4.** The change of the potential suitable area of *Spodoptera exempta* under current and future climatic conditions

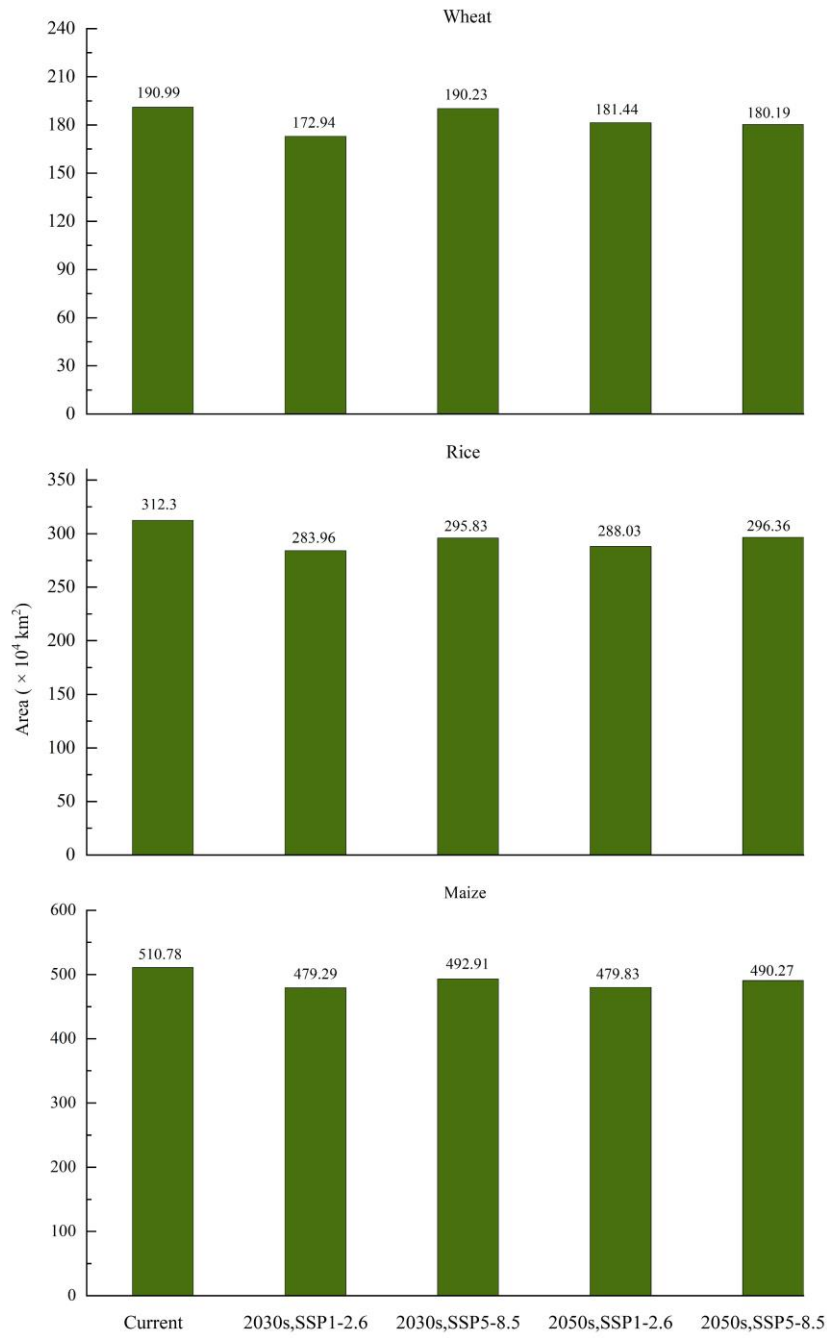

**Figure S5.** The change of the overlapping areas of *Spodoptera exempta* intersected with global wheat, rice and maize acreage under current and future climatic conditions.
